1     **Genomic prediction offers the most effective marker assisted**  
2     **breeding approach for ability to prevent arsenic accumulation**  
3                               **in rice grains**

4     Julien Frouin<sup>1,2</sup>, Axel Labeyrie<sup>1,2</sup>, Arnaud Boizard<sup>4</sup>, Gian Attilio Sacchi<sup>3</sup>, Nourollah Ahmadi<sup>1,2\*</sup>

5     1 CIRAD, UMR AGAP, F-34398 Montpellier, France.

6     2 AGAP, Univ Montpellier, CIRAD, INRA, Montpellier SupAgro, Montpellier, France.

7     3: Università degli Studi di Milano, Via Celoria 2, 20133 Milano, Italy.

8     4: Centre Français du Riz, Mas du Sonnailler, 13200 Arles, France.

9     \* Correspondence: Nourollah Ahmadi,

10    E-mail: [nourollah.ahmadi@cirad.fr](mailto:nourollah.ahmadi@cirad.fr) ,

11    Phone number: (33) 4 67 61 57 41

12    [orcid.org/0000-0003-0072-6285](https://orcid.org/0000-0003-0072-6285)

13

## 14 **Abstract**

15 The high concentration of arsenic in the paddy fields and, consequently, in the rice grains is a critical  
16 issue in many rice-growing areas. Breeding arsenic tolerant rice varieties that prevent *As* uptake and  
17 its accumulation in the grains is a major mitigation options. However, the genetic control of the trait  
18 is complex, involving large number of gene of limited individual effect, and raises the question of the  
19 most efficient breeding method. Using data from three years of experiment in a naturally arsenic-  
20 reach field, we analysed the performances of the two major breeding methods: conventional,  
21 quantitative trait loci based, selection targeting loci involved in arsenic tolerance, and the emerging,  
22 genomic selection, predicting genetic values without prior hypotheses on causal relationships  
23 between markers and target traits. We showed that once calibrated in a reference population the  
24 accuracy of genomic prediction of arsenic content in the grains of the breeding population was rather  
25 high, ensuring genetic gains per time unite close to phenotypic selection. Conversely, selection  
26 targeting quantitative loci proved to be less robust as, though in agreement with the literature on the  
27 genetic bases of arsenic tolerance, few target loci identified in the reference population could be  
28 validated in the breeding population.

29

30

## 31 **Introduction**

32 A survey of total arsenic (*As*) in 901 samples of commercial polished (white) rice collected randomly  
33 from arsenic contaminated or non-contaminated areas in 10 countries showed 7-fold variation in  
34 median total arsenic content. The lowest median value (0.04 mg/kg) was measured in Egypt and the  
35 highest in the U.S.A. and France, 0.25 and 0.28 mg/kg, respectively [1]. Pollution of paddy fields and  
36 irrigation water by *As* has been reported in more than 70 countries in Asia, America and Europe [2,  
37 3]. The problem, which is often of geological origin, affects several hundred million peoples,  
38 especially in Asia [1, 3, 4]. Local and regional surveys revealed a tight correlation between *As*  
39 concentration in the soil, or in the irrigation water, and its concentration in the rice plant [2, 5]. At all  
40 sampling sites, *As* accumulation in the rice plant was the highest in the roots, followed by in the straw  
41 and cargo grain. Similar results have been observed in greenhouse experiments [6]. Pollution of the  
42 paddy field by *As* also affects crop growth and development (lower germination rate, reduced shoot  
43 and root growth and biomass production, etc.) and, consequently, crop yield [6].

44 Alternate wetting and drying of the paddy field during the cropping season is the most effective way  
45 of achieving agronomic mitigation [7]. Application of silicon (*Si*) fertilizer can also reduce the  
46 concentration of *As* in the rice plant [8]. A second category of mitigation options relies on rice  
47 genetic improvement to reduce *As* uptake and/or its translocation from the vegetative organs to the  
48 grains.

49 Mechanisms of rice plant response to soil *As* excess have been reported to be similar to those  
50 observed for other types of soil chemical toxicity [9]. However, the mechanisms related to the  
51 phytotoxic effects of *As* and the rice defense response to *As* remain poorly understood. In aerobic  
52 conditions, the predominant form of soil *As* is arsenate,  $As(OH)_5$  or *As(V)*, and its uptake by plants  
53 involves phosphate transporters [10]. Overexposure to *As(V)* triggers reduced expression of genes  
54 coding for arsenate/phosphate transporters such as PHT1 [11]. At the same time, the arsenate taken  
55 up undergoes chemical reduction to a more highly toxic species, arsenite [*As(III)*] [12, 13]. The  
56 arsenite is then either excreted into the rhizosphere [14, 15], or transported to aboveground organs  
57 [16], and/or detoxified by complexation as phytochelatin and compartmentalized in the vacuoles  
58 [17]. In paddy fields, the predominant form of *As* is arsenite [18]. It enters root cells through  
59 aquaporin type membrane ports [19]. Transporters involved in the process include silicon  
60 transporters Lsi1 (influx) and Lsi2 (efflux) [19, 20] and several silicon-independent pathways [21,  
61 22].

62 Significant genetic diversity for *As* accumulation has been reported in *A. thaliana* and in rice. In *A.*  
63 *thaliana*, genome-wide association analysis (GWAS) detected the HAC1 gene (High arsenic content  
64 1) responsible for arsenate reductase activity in the root, facilitating arsenite efflux to the soil. In rice,  
65 significant genetic diversity for *As* accumulation has been reported under overexposure to *As* in both  
66 hydroponic cultivation and in field experiments [23-26]. Analysis of grain *As* content in 300 rice  
67 accessions grown in six sites distributed in Bangladesh, China and USA revealed from 3 to 34 fold  
68 variation in each site [25]. It also revealed that accessions belonging to the *Aus* genetic group had the  
69 highest *As* contents.

70 Using recombinant inbred lines (RIL) from bi-parental crosses, several QTLs involved in *As*  
71 accumulation have been mapped [23, 26-29]. Likewise, the use of phenotypic data produced in [27]  
72 for GWAS has detected several significant associations for grain *As* content [30]. However, none of  
73 the significant associations mapped in the vicinity (distance of less than 200 kb) of the Os02g51110  
74 and Os03g01700 loci coding for Lsi1 and Lsi2 proteins, previously reported [19, 20] to play a central  
75 role in rice response to *As* overexposure. Likewise, very few significant associations colocalized with  
76 QTLs mapped in RIL populations [25]. Analysis of *As*-induced genome-wide modulation of  
77 transcriptomes of rice seedling roots revealed up-regulation of several hundred genes, confirming the  
78 complexity of the gene network involved in response to *As* overexposure [31-34]. Gene families with  
79 differential gene expression in *As* tolerant and *As*-susceptible genotypes include glutathione S-  
80 transferases, cytochrome P450s, heat shock proteins, metal-binding proteins, and a large number of  
81 transporters and transcriptions factors such as MYBs [35]. MYB genes may be crucial in *As*(V) stress  
82 tolerance as they upregulate phenylpropanoid and flavonoid biosynthetic pathways. More recently,  
83 using a reverse genetics approach, [36] showed that OsHAC1;1 and OsHAC1;2 (two orthologs of *A.*  
84 *thaliana* HAC1) functioned as *As*(V) reductases and played a role in the control of *As* accumulation  
85 in rice. Likewise, [14] showed that OsHAC4 played a critical role in rice tolerance to arsenate and  
86 regulated arsenic accumulation in rice. Based on these findings, some authors recently advocated  
87 using gene-editing technology to improve rice *As* tolerance [7, 22].

88 Here we report the results of our research into the potential of more conventional, marker assisted,  
89 breeding approaches to improve the ability of rice to restrict *As* accumulation in the grains. First, we  
90 used field phenotypic data (leaf and grain *As* content of rice plants grown on soil with rather high *As*  
91 concentration) and genotypic data from a reference diversity panel, to either map QTLs involved in  
92 *As* accumulation through GWAS or to train genomic prediction models. Second, using similar  
93 phenotypic and genotypic data from a panel of advanced lines from a breeding program, we analyzed

94 congruence between GWAS results in the two populations, and evaluated the predictive ability of  
95 genomic prediction across the two populations. Our results identified genomic prediction as the most  
96 promising approach to improve the ability of rice to restrict As uptake and its accumulation in the  
97 grains.

98

## 99 **Results**

### 100 **Phenotypic diversity for arsenic content**

101 In 2014, soil analyses before crop establishment and after crop harvest revealed similar arsenic  
102 concentrations of about 10 mg kg<sup>-1</sup> soil dry weight. During the same period, the monthly survey of  
103 the irrigation water revealed variable arsenic contents (0.014 to 0.034 mg l<sup>-1</sup>) with an average of  
104 0.021 mg l<sup>-1</sup>. Similar soil and water arsenic contents were observed in 2015 and 2016 (S2 Table).

#### 105 *Variation in arsenic content in the reference population*

106 The three arsenic-related traits evaluated exhibited normal distribution (Figure 1). Partitioning of the  
107 observed phenotypic variations into different sources of variation via the mixed model analysis  
108 revealed a highly significant effect of accession for all traits considered (Table 1). In 2014, the model  
109 R<sup>2</sup> was greater than 0.70 for the three traits, indicating a good fit of the model. Similarly high R<sup>2</sup> were  
110 observed in 2015 (0.63 for Ratio, 0.80 for FL-As and CG-As). Broad-sense heritability tended to  
111 confirm this trend, with values ranging from 0.80 to 0.86 in 2014, and above 0.91 in 2015 (Table 1).

112 In 2014, variation in FL-As among the 300 accessions of RP ranged from 1.34 to 15.61 and averaged  
113 5.88 mg kg<sup>-1</sup> of dry weight. Variation in CG-As ranged from 0.147 to 0.656 mg kg<sup>-1</sup> and averaged  
114 0.335. The determination coefficient between FL-As and CG-As was rather low but highly significant  
115 (R<sup>2</sup> = 0.20, p < 0.0001). This rather loose relationship between FL-As and CG-As corroborates the  
116 significant accession effect observed for the CG/FL-As ratio.

117 In 2015, the range of variation in FL-As among the 50 accessions of RP with contrasted arsenic  
118 contents in 2014 was much larger (from 3.69 to 34.69; average of 16.83 mg kg<sup>-1</sup>), while the range of  
119 variation in CG-As was slightly narrower (0.169 to 0.493; average of 0.338 mg kg<sup>-1</sup>). However, these  
120 differences in the range of variation did not change either the relative ranking of the 50 accessions  
121 observed in 2014, or the determining effect of FL-As on CG-As. Indeed, the Spearman coefficient of  
122 rank correlation between performances of the 50 RP accessions in 2014 and 2015 was r = 0.72 (p <  
123 0.0001) for FL-As, r = 0.68 (p < 0.0001) for CG-As, and r = 0.59 (p < 0.0001) for CG/FL-As.

124 Likewise, the determination coefficient between FL-As and CG-As of the 50 accessions in 2015 was  
125 higher ( $R^2 = 0.56$ ,  $p < 0.0001$ ) than the one observed in 2014 for the 300 accessions of RP.

### 126 ***Variation in arsenic content in the validation population***

127 Variation in FL-As among the 95 accessions in the VP ranged from 3.24 to 37.76 and averaged 14.61  
128 mg kg<sup>-1</sup>. Variation in CG-As ranged from 0.208 to 0.729 mg kg<sup>-1</sup> and averaged 0.341. The  
129 determination coefficient between the FL-As and CG-As was low but highly significant ( $R^2 = 0.20$ ,  $p$   
130  $< 0.0001$ ). The CG-As/FL-As ratio varied between 0.179 and 0.636 and averaged 0.336 (Figure 1).

### 131 **Genetic diversity and structure of the reference and validation populations**

132 Analysis of genetic diversity was performed for 228 RP accessions and 95 VP accessions for whom  
133 sufficient GBS data were available for association analysis and genomic prediction.

134 The 22,370 SNP markers of the working dataset were unevenly distributed along the chromosomes  
135 (S1 Figure; S3 Table). Average marker density was one SNP every 17.1 kb. However, it ranged from  
136 one SNP every 10.7 kb in chromosome 11 to 26.7 kb in chromosome 9. The number of pairs of loci  
137 with a distance greater than 250 kb, 500 kb and 1 Mb was 175, 27 and one, respectively.

138 The decay of LD over physical distance in the two populations is presented in Figure 2. For between-  
139 marker distances of 0 to 25 kb, the average  $r^2$  was 0.67 and 0.73 in RP and VP, respectively. In the  
140 RP, the  $r^2$  value dropped to half its initial level at around 450 kb, reached 0.2 at 1.25 Mb, and below  
141 0.1 at 2.10 Mb. In the VP,  $r^2$  reached the 0.2 threshold only at pairwise distances of around 1.70 Mb,  
142 and the 0.1 threshold at distances above 3 Mb. No major difference in LD decay was observed  
143 between chromosomes. Given these extents of average LDs, one would not expect marker density  
144 and distribution along the chromosome to be a major limiting factor for the detection of significant  
145 associations and for the predictive ability of genomic prediction.

146 The two populations showed similar MAF patterns for the 22,370 common SNP loci. RP and VP had  
147 the same minor allele in 95.4% of the common loci. In both populations, the MAF distribution was  
148 slightly skewed toward low frequencies, the average MAF was close to 22.2%, and the proportion of  
149 loci with MAF  $< 10\%$  was close to 75%. Likewise, the Spearman correlation between the MAF of  
150 the 21,343 loci with identical minor alleles in the two populations was  $r = 0.85$  ( $p < 0.01$ ).

151 Dissymmetry-based clustering of RP accessions led to two major clusters corresponding to the  
152 temperate *japonica* (65% of accessions) and tropical *japonica* (35% of accessions) sub-groups  
153 (Figure 3). The majority of the temperate *japonica* accessions are of European origin. The majority of

154 the tropical *japonica* accessions originate from the American continent. The inclusion of the VP lines  
155 in the analysis did not modify the clustering into two groups. Indeed, 69% of VP lines clustered with  
156 the temperate *japonica* group and the remaining 31% with the tropical *japonica* group (Figure 3; S1  
157 Table).

## 158 **Relationship between genotypic and phenotypic diversity**

159 Highly significant differences in *As* content were observed between the temperate *japonica* and the  
160 tropical *japonica* accessions of RP evaluated in 2014. The former subgroup had the highest arsenic  
161 contents (S4 Table; S2 Figure). Data from the 50 RP accessions evaluated in 2015 confirmed this  
162 trend. Interestingly, similar to the RP, significant differences in FL-*As* and CG-*As* were also observed  
163 between the temperate *japonica* and the tropical *japonica* components of VP, the former subgroup  
164 having the highest contents. This superposition of genotypic and phenotypic diversity may negatively  
165 influence QTL detection.

## 166 **Association analyses**

### 167 *Association analysis in the reference population*

168 Results of association analysis of the three traits in the RP are presented in Figure 4 and S5 Table.  
169 The number of significant associations (p-value < 1e-05) was 41 for FL-*As*, 23 for CG-*As* and 82 for  
170 Ratio. These associations represented 6, 13 and 19 independent loci, i.e. a cluster of SNPs with a  
171 distance of less than 1.25 Mb between two consecutive significant SNPs, corresponding to the  
172 average LD of  $r^2 < 0.2$ . These loci were composed of 1-35 SNPs, not always adjacent, with p-values  
173 ranging between 1e-05 and 1e-07. None of the significant SNPs or independent loci for one trait were  
174 found to be significant for another trait. The MAF of the significant SNPs ranged from 2.5% to  
175 49.4% and averaged 36.1% for FL-*As*, 11.7% for CG-*As* and 27.5% for Ratio. The contribution of  
176 individual significant SNPs to the total variance of the trait considered (marker R<sup>2</sup>) was low and did  
177 not exceed 12%. Among the 41 SNPs significantly associated with PI-*As*, 11 corresponding to three  
178 independent loci had marker R<sup>2</sup> > 10%. The highest marker R<sup>2</sup> observed among the 23 SNPs  
179 significantly associated with CG-*As*, was 8%. Among the 82 SNPs significantly associated with  
180 Ratio, nine corresponding to six independent loci had marker R<sup>2</sup> > 10%.

181



## 182 *Association analysis in the validation population*

183 Results of association analysis for the three traits in the VP are presented in Figure 4 and S5 Table.  
184 The number of significant associations was 15 for FL-As, 75 for CG-As and 8 for Ratio. These  
185 associations represented 8, 30 and 5 independent loci. These loci were composed of 1-22 not always  
186 adjacent SNPs, with p-values ranging between 1e-05 and 1e-09. Similar to RP, significant SNP loci  
187 for the three traits did not colocalize. The MAF of the significant SNP ranged from 2.6% to 46.8%  
188 and averaged 28.0% for FL-As, 9.0% for CG-As and 9.1% for Ratio. The significant SNPs  
189 contributed much more, on average, to trait total variance than the ones observed in the RP. The  
190 mean marker R<sup>2</sup> was 18% for SNPs associated with FL-As, 24% for SNPs associated with CG-As  
191 and 16% for SNPs associated with Ratio.

## 192 *Congruence between the results of GWAS in RP and in VP*

193 Among the 146 SNPs significantly associated with one of the three traits in the RP, only eight were  
194 also significant in the VP. These SNPs corresponded to one independent locus associated with CG-  
195 As. The application of a margin of tolerance of 1.7 Mb between a significant locus in RP and its  
196 counterpart in VP (corresponding to the average distances for LD of 0.2 in the VP) only slightly  
197 increased the number of colocalizations: four additional colocalizations for CG-As and one for Ratio.  
198 On the other hand, the number of such colocalizations increased markedly (9, 20 and 12 for FL-As,  
199 CG-As and Ratio, respectively) when the threshold of significance of association in the two  
200 populations was lowered to a p-value < 1e-04 (Figure 4). The latter features represented 69%, 40%  
201 and 52% of the independent significant loci detected in RP for FL-As, CG-As and Ratio, respectively.

## 202 *Genomic localization and co-localization with QTLs and gene reported in the literature*

203 Out of a total of 146 SNPs significantly associated with one of the three As related traits in the RP,  
204 41% were located in intergenic regions, 14% in introns, 27% in exons with synonymous coding  
205 effects, 10% in exons with non-synonymous coding effects, 6% in UTR-3 regions and 2% in stop-  
206 gained sites (S6 Table). The proportions were similar for the 96 significant loci in the VP and for  
207 those observed among all the 22,370 SNPs used for GWAS. Genes underlying the significant loci  
208 included ATP binding cassette involved in arsenic detoxification (e.g. Os04g0620000), transporters  
209 (e.g. phosphate, ammonium, peptide, efflux transporters MATE) abiotic stress responsive genes (e.g.  
210 several F-box and DUF domain containing proteins, cytochrome P450) and transcription factors (e.g.  
211 MBY, zinc finger family protein, ERF).



212 A genome survey within an interval of 400 kb (200 kb downstream and 200 kb upstream)  
213 surrounding each significant SNP in the RP and in the VP led to the identification of at least one gene  
214 with the product involved in plant response to abiotic stresses or reported in the literature as  
215 responsive to *As* stress (Figure 4 and S6 Table). The latter included OsLsi1, OsHAC1, OsHAC6,  
216 OsACR2-1 and representative of glutathione S-transferases, Cytochrome P450s, heat shock proteins,  
217 metal-binding proteins, phosphate acquisition proteins, transporter proteins and transcription factors.  
218 Likewise, a survey of the surrounding interval of 400 kb of the significant SNPs for QTL reported in  
219 the literature to be associated with *As* resulted in a large number of colocalizations (Figure 4 and S6  
220 Table)

## 221 **Genomic prediction**

### 222 *Cross validation experiment in the reference population*

223 Application of seven cross validation experiments (corresponding to seven prediction methods) to  
224 each of the three phenotypic traits led to average prediction accuracies of 0.484 for FL-*As*, 0.574 for  
225 CG-*As* and 0.414 for Ratio (Table 2). Differences in predictive ability between the three traits were  
226 highly significant ( $P < 0.0001$ ). Among the seven prediction methods, RKHS showed the highest  
227 average predictive ability (0.475) and BayesB and BayesC the lowest (0.435). However, a marked  
228 interaction was observed between prediction methods and traits (Table 2).

229 In order to evaluate the effect of exclusion of highly redundant SNP ( $r^2 = 1$ ), the cross validation  
230 experiment was also implemented with the full set of SNPs available (22,370), under GBLUP.  
231 Results showed negligible effects on predictive ability:  $r = 0.449$  versus 0.450 with the incidence  
232 matrix of 16,902 for FL-*As*,  $r = 0.535$  versus 0.536 for CG-*As*, and  $r = 0.356$  versus 0.357 for Ratio.

### 233 *Genomic prediction across populations*

234 Under the S1 scenario, using all the 228 accessions of the RP as the training set, the predictive ability  
235 of genomic estimate of breeding value (GEBV) of the 95 lines of VP was on average 0.426 for FL-  
236 *As*, 0.476 for CG-*As* and 0.234 for Ratio (Figure 5 and S7 Table). The three prediction methods  
237 implemented provided similar levels of average predictive ability. However, there was some  
238 interaction between prediction methods and phenotypic traits. Like for the cross validation  
239 experiments, the addition of the redundant SNPs in the incidence matrix did not noticeably modify  
240 the predictive ability (Figure 5).

241 The predictive ability of GEBV were much lower under S2, with averages of 0.266, 0.411 and -0.016  
242 for FL-As, CG-As and Ratio respectively (Figure 5). Under S3, the average predictive ability was  
243 slightly higher than under S1 for CG-As (0.491), and much lower than under S1 for FL-As (0.341)  
244 and for Ratio (0.073).

245

246

## 247 **Discussion**

248 The aim of this work was to explore (i) the phenotypic diversity of the rice *japonica* subspecies,  
249 adapted for cultivation in Mediterranean Europe, to restrict As accumulation in the grains, and (ii) the  
250 potential of the two major options for marker-assisted selection for the improvement of the trait, i.e.  
251 QTL-based selection and genomic estimate of breeding value (GEBV)-based selection.

252 Phenotypic diversity for As accumulation was evaluated in field experiments with uncontrolled  
253 intensity of exposure to As. However, we observed a rather stable soil As concentration of about 10  
254 mg kg<sup>-1</sup> across the crop cycles, and in the three consecutive years of field experiments. This  
255 concentration corresponded to the class of rather high As contents reported for paddy fields in  
256 countries including Bangladesh [37], China [4] and the USA [38]. The range of variation of CG-As  
257 (0.15 to 0.66 mg kg<sup>-1</sup>) among the accessions of RP was similar to the range observed by [34] in a  
258 panel of some 400 accessions representative of the diversity of all the *O. sativa* species  
259 (<http://www.ricediversity.org/>), evaluated in a multilocal trial in Bangladesh, China and the USA.

260 The rather loose relationship between FL-As and CG-As we observed suggests there are differences  
261 between accessions in the ability to limit As transfer from the leaves to the grains. To our knowledge,  
262 the existence of such genetic diversity for the CG-As/FL-As ratio has not yet been reported in the  
263 literature. The number of rice accessions studied by [37] and [38], who investigated the relationship  
264 between rice shoot and grain As, was probably too low to reveal the genetic diversity we observed for  
265 CG-As/FL-As ratio. The rather high correlation between the performances of the 50 RP accessions  
266 evaluated twice, in two consecutive years, is evidence for the robustness of our findings concerning  
267 the extent of genetic diversity for FL-As and CG-As and on the relationship between the two traits.  
268 Interestingly, the extent of FL-As and CG-As in the VP was as large as that observed in the RP,  
269 despite its much smaller size, with only 95 accessions.

270 In order to explore the potential of marker-QTL association-based breeding for aptitude to restrict *As*  
271 accumulation in the grains, we performed association analysis in the RP to detect QTLs. A large  
272 number of QTLs was detected for each of the three traits considered. Some of these QTLs  
273 colocalized with already reported QTLs [26-29], candidate genes [21, 39], or cloned genes [20, 36].  
274 However, only a few of the QTLs that we detected for the three traits colocalized with each other,  
275 some QTLs stretched over several Mb due to the large extent of LD, and none explained more than  
276 10% of total phenotypic variance.

277 Several factors affect the success of GWAS in precisely mapping QTLs. These include the  
278 architecture and the heritability of the target trait, the size and the structure of the population, the  
279 number of loci affecting the traits that segregate in the population and their relationship with  
280 population structure, the statistical method, and the stringency of the threshold to declare association  
281 significance [40]. Apart from the choice of the statistical method and the significance threshold, the  
282 experimenter has often limited control over such factors. The exact MLM method we used is known  
283 to successfully correct for population structure and family relatedness [41]. Regarding the threshold  
284 of significance, several methods have been proposed to overcome the problem of multiple testing.  
285 These include monitoring of the number of false positives [42], permutation and boost-trap testing  
286 [43], comparing the results of 2-3 different GWAS methods [44], and sub-sampling [45]. However,  
287 the only evidence that a significant association detected in a GWAS is “real”, is its validation in an  
288 independent population [46], and such a replication requires a sufficiently large validation population  
289 to ensure detection power, and with similar features to the initial study of the above-mentioned  
290 factors that affect QTL detection [47].

291 GWAS with our VP detected a similarly large number of SNP and independent loci as with the RP,  
292 despite its smaller size (95 entries = 42% of RP size). However, only a few of the QTLs detected in  
293 the VP colocalized with the QTLs detected in the RP, despite considerable loosening of the interval  
294 surrounding each QTL, or lowering the significance threshold from 1e-05 to 1e-04. Yet, VP had  
295 similar features to RP for some of the factors that affect the GWAS results, such as population  
296 structure (composed of temperate and tropical *japonica*), the relationship between population  
297 structure and variability of the target trait (the temperate *japonica* having the highest *As* contents) and  
298 MAF distribution. Likewise, almost all the 95 advanced lines of VP were derived from crosses  
299 between members of RP.

300 Given the above-mentioned superposition of the distributions of the phenotypic variability and the  
301 structuring of RP and VP into temperate and tropical *japonica*, our GWAS results might have been

302 subject to an abnormal rate of false negatives due to a confounding phenomenon [48]. To evaluate  
303 this risk, we performed separate association analyses with the 153 temperate and the 75 tropical  
304 *japonica* accessions of RP. These analyses detected, at best, 50% of the QTLs detected with the  
305 entire RP, without markedly increasing the P-value for each association (data not shown). The  
306 expected positive effects of diverting the confounding phenomenon proved to be smaller than the  
307 reduced detection power due to the reduced size of the population.

308 The conclusions we draw from these results are that (i) a diversity panel with a large extent of LD has  
309 limited genetic resolution power, (ii) it is unlikely that a single GWAS makes it possible to establish  
310 robust and precise genotype–phenotype associations, especially for complex traits, and (iii)  
311 implementation of an independent replication experiment is a complex process with uncertain results.

312 To explore the potential of genomic prediction options for breeding for the ability to restrict *As*  
313 accumulation in grains, we tested a large set of prediction methods using the cross-validation  
314 approach in the RP, and then performed prediction across populations with a smaller set of methods.  
315 The level of predictive ability for FL-*As* and CG-*As* in the cross validation experiments was similar  
316 to the levels reported in the literature for traits of equivalent heritability in rice [49] and other major  
317 crops [50, 51]. Predictions were less accurate for the Ratio trait, which, by design, accumulated the  
318 experimental noises associated with the evaluation of FL-*As* and CG-*As*. The cross validation  
319 experiments also confirmed the limited differences in predictive ability between prediction methods  
320 reported in rice [49, 52] and in other crops [53, 54]. The exclusion of the most redundant SNP  
321 markers, based on LD information, had a limited effect on predictive ability, confirming the fact that  
322 accounting for LD in the population matters more than the absolute marker density [55].

323 Across population genomic prediction with models trained with RP data led to slightly lower  
324 predictive ability than the predictive ability observed in the cross-validation experiments. Similar  
325 decreases in predictive ability have been reported in rice [49], sugar beet [56], barley [51] and  
326 strawberry [57], and were attributed to differences in LD and allele frequencies between the training  
327 and the validation sets. Differences in the extent and pattern of LD between the training sets  
328 represented by diversity panels and the validation sets composed of advanced lines are inevitable  
329 [58]. On the other hand, in our case, no significant differences in predictive ability were found  
330 between the GBLUP model that captures marker-based relationship between RP and VP, and RKHS  
331 and BayesB that captures LD between markers and QTLs. An attempt to reduce the discrepancy in  
332 allele frequency between RP and VP by discarding SNP loci with highly divergent MAF did not  
333 markedly change predictive ability (data not shown). Neither could conclusive improvement in

334 predictive ability be achieved by optimizing the composition of the training set using the CD-mean  
335 approach [59]. These findings suggest that further research aimed at improving the predictive ability  
336 of across population genomic predictions should explore the effects of the size of the training set (use  
337 a larger training set) and of the balance between marker density and the regularity of their  
338 distribution along the genome. Indeed, in the present work, marker density (one SNP every 17.1 kb)  
339 was rather high, given the extent of LD, but their distribution was not optimized given the GBS  
340 genotyping technology.

341 The critical importance of reducing the presence of *As* in the rice grains in a large proportion of rice  
342 growing areas has recently resulted in steady efforts to understand the molecular mechanisms  
343 involved in plant response to overexposure to *As* [10, 22] and the genetic control of these  
344 mechanisms [15, 16, 19]. Although a few genes, reported as being “crucial”, have been cloned [36],  
345 transcriptome analyses [21, 39] and GWAS results [30] suggest that *As* tolerance is a complex trait  
346 involving a large number of loci with limited individual effect on the trait.

347 The number of candidate loci makes marker-assisted pyramiding of the favourable alleles  
348 unpractical. Moreover, uncertainty concerning the exact genomic position of some of the loci makes  
349 the outcome of marker-assisted pyramiding unpredictable. Indeed, as discussed above, GWAS results  
350 raise robustness issues, and this also seems to be the case for transcriptome analyses [60].

351 The GEBV we obtained for flag leaf and cargo grain *As* contents were reasonably accurate in both  
352 intra-population (cross validation in the RP) and across-population (RP/VP) prediction experiments.  
353 Translation of those prediction accuracies into average phenotypic performances of VP lines selected  
354 based on their GEBV by model trained with the RP is even more encouraging. Indeed, the average  
355 FL-*As* and CG-*As* of the best 10 VP lines selected on the basis of phenotypic data were 41% and 65%  
356 of the average FL-*As* and CG-*As* of all 95 lines of VP. The average FL-*As* and CG-*As* of the best 10  
357 VP lines selected on the base of GEBV were 55% and 85% of the average FL-*As* and CG-*As* the  
358 whole 95 lines of VP (S8 Table). In other words, for a selection rate of 10%, the difference in genetic  
359 gain between phenotypic selection and GEBV based selection was only 10% for FL-*As* and 5% for  
360 CG-*As*. Given these rather small differences in genetic gains, the choice between phenotypic and  
361 GEBV based selection will depend mainly on the comparative costs of genotyping and phenotyping  
362 for *As* content. If the costs are similar, the best choice would be GEBV-based selection because  
363 genotypic data are a multi-purpose asset that can also be used for genomic prediction of other traits  
364 than *As* content. The possibility of changing the genotyping method to obtain a smaller but more  
365 evenly distributed number of markers should also be considered in the decision making process.

366 Indeed, simulation works [61] and experimental data [42] have shown that, if markers are chosen  
367 based on LD distribution along the chromosomes, the number of markers can be reduced drastically  
368 without affecting predictive ability.

369 To conclude, considering the limitations of QTL-based marker-assisted selection for *As* and the level  
370 of predictive ability of GEBV, genomic prediction proves to be the most promising option for  
371 breeding for the ability to restrict *As* accumulation in the rice grain. In a previous study [49], we  
372 showed that a rice diversity panel could provide accurate genomic predictions for complex traits in  
373 the progenies of biparental crosses involving members of the panel. In addition, associated with the  
374 rapid generation advancement technique, genomic selection can accelerate the genetic gain of the  
375 pedigree breeding scheme, the most common breeding scheme in rice. GS for *As* content can be  
376 incorporated in such a breeding program. The main additional cost would be the phenotyping of the  
377 diversity/reference panel for *As* content.

378



## 379 **Methods**

### 380 **Plant material**

381 The initial plant material comprised a diversity panel of 300 accessions and set of 100 advanced  
382 inbred lines (F5–F7), all belonging to the *japonica* subspecies of *O. sativa*, and adapted to cultivation  
383 in the irrigated rice ecosystem of temperate Mediterranean Europe. The diversity panel, hereafter  
384 referred to as the reference population (RP), was composed of 214 accessions representing the  
385 European Rice Core Collection (ERCC), established by merging the working collections of five  
386 European public rice breeding programs in France, Greece, Italy, Portugal and Spain [62], and 86  
387 accessions of direct interest for the Camargue-France breeding program (S1 Table). The 95 advanced  
388 breeding lines hereafter referred to as the validation population (VP), was composed of elite lines of  
389 the rice breeding program run by the *Centre Français du Riz* (CFR) and Cirad, in the Camargue  
390 region, France.

### 391 **Field trials and phenotyping**

392 Field trials were conducted at the CFR experimental station, Mas d'Adrien (43°42'13.77"N;  
393 4°33'44.71"E; 3 m asl.), under a standard irrigated rice cropping system. The RP was phenotyped in  
394 two consecutive years (2014 and 2015), the VP only in 2016. In 2014, all 300 accessions of RP were  
395 phenotyped under an augmented randomized complete block design repeated twice, each block being  
396 composed of 25 tested accessions and two check varieties (Albaron and Brio). In 2015, 50 accessions  
397 of RP, with contrasted *As* content performances, were phenotyped in complete randomized blocks  
398 with eight replicates. In both 2014 and 2015 trials, the size of the individual plot was one row of 15  
399 plants. In 2016, each of the 95 advanced lines of VP was represented by five full-sib lines and the  
400 size of the individual plot for each full-sib line was one row of 15 plants.

401 In each field trial, the concentration of total arsenic in the flag leaf (FL-*As*) and in the cargo grain  
402 (CG-*As*) was measured and the CG-*As*/FL-*As* ratio calculated. In the 2014 and 2015 trials, three  
403 biological samples were prepared for each individual plot to measure FL-*As*. Each biological sample  
404 was composed of three flag leaves of three different plants. Each biological sample was oven-dried at  
405 75°C for 120 h, ground, mineralized, and total arsenic concentration was measured using the  
406 inductively coupled plasma mass spectrum (ICP-MA; Bruker Aurora ICP Mass Spectrometer). For  
407 each biological sample, total arsenic was measured in at least two technical samples and averaged to  
408 establish the sample phenotype. Data from the three biological samples were averaged to establish



409 the plot phenotype. A similar procedure was applied to CG-As measurement in which the biological  
410 samples were composed of three panicles. These panicles were threshed after oven drying, the  
411 resulting paddy grains were dehusked, and the cargo grain was ground before undergoing the  
412 mineralization procedure.

413 In 2016, FL-As and CG-As were measured in one randomly chosen sib-line in each advanced line.  
414 Two biological samples were prepared from each chosen sib-line: one biological sample from an  
415 individual plant that was also used for DNA extraction and genotyping (see below), and a second  
416 sample from the bulk of at least three plants.

417 In each field trial, the soil total As content was measured before sowing and after harvest. Likewise,  
418 in each field trial, total As content of irrigation water was monitored once a month during the rice  
419 cropping cycle.

## 420 **Genotypic data**

421 Genotypic data were produced by two distinct genotyping by sequencing (GBS) experiments, for 228  
422 accessions of RP and 95 lines of VP. In both cases, DNA libraries were prepared at the Regional  
423 Genotyping Technology Platform (<http://www.gptr-lr-genotypage.com>) hosted by Cirad, Montpellier  
424 France). Genomic DNA was extracted from the leaf tissues of a single plant from each accession  
425 using the MATAB method and then diluted to 100 ng/μl. Each DNA sample was digested separately  
426 with the restriction enzyme *ApeKI*. DNA libraries were then single-end sequenced in a single-flow  
427 cell channel (i.e., 96-plex sequencing) using an Illumina HiSeq™2000 (Illumina, Inc.) at the  
428 Regional Genotyping Platform (<http://get.genotoul.fr/>) hosted by INRA, Toulouse, France. The fastq  
429 sequences were aligned to the rice reference genome (Os-Nipponbare-Reference-IRGSP-1.0 [63])  
430 with Bowtie2 (default parameters). Non-aligning sequences and sequences with multiple positions  
431 were discarded. Single nucleotide polymorphism (SNP) calling was performed using the Tassel GBS  
432 pipeline v5.2.29. The initial filters applied were the quality score (>20), the count of minor alleles  
433 (>1), and the bi-allelic status of SNPs. In the second step, loci with minor allele frequency (MAF)  
434 below 2.5% and with more than 20% missing data were discarded. The missing data were imputed  
435 using Beagle v4.0. The RP and VP genotyping experiment yielded 39,497 and 67,658 SNP loci,  
436 respectively, among which 22,370 were common to the two populations. This working dataset can be  
437 downloaded in HapMap format from  
438 <http://tropgenedb.cirad.fr/tropgene/JSP/interface.jsp?module=RICE> study Genotypes, study type ML  
439 panel\_GBS\_data.

## 440 **Analysis of phenotypic data**

441 In 2014, RP plot phenotypic data of the 300 accessions were modeled for each trait as:

$$Y_{ijk} = \mu + a_i + r_j + b_{jk} + \beta(r)_{jk} + (ar)_{ij} + e_{ij}$$

442 where  $Y_{ijk}$  is the observed phenotype of accession  $i$  in replicate  $j$  and bloc  $k$ ,  $\mu$  is the overall mean,  $a_i$   
443 the accession effect,  $r_j$  the replicate effect,  $b_{jk}$  the check effect considered as quantitative covariate,  
444  $\beta(r)_{jk}$  the block effect within the replicate,  $(ar)_{ij}$  the interaction between accessions and replicates,  
445 and  $e_{ij}$  the residual.

446 In 2015, RP plot phenotypic data of the 100 advanced lines were modeled for each trait as  $Y_{ij} = \mu +$   
447  $a_i + r_j + (ar)_{ij} + e_{ij}$  where  $Y_{ij}$  is the observed phenotype of accession  $i$  in bloc  $j$ ,  $\mu$  is the overall  
448 mean,  $a_i$  the accession effect,  $r_j$  the replicate effect,  $(ar)_{ij}$  the interaction between accession  $i$  and  
449 replicate  $j$ , considered as random, and  $e_{ij}$  the residual. For each dataset and each trait, least square  
450 means were estimated using the mixed model procedure of Minitab 18.1.0 statistical software  
451 (Minitab Inc. 2017).

452 Broad-sense heritability was calculated for each trait as:  $h^2 = \sigma_g^2 / (\sigma_g^2 + \sigma_e^2/n)$ , where  $\sigma_g^2$  and  $\sigma_e^2$   
453 are the estimates of genetic and residual variances, respectively, derived from the expected mean  
454 squares of the analysis of variance and  $n$  is the number of replicates. The computed CG-As/FL-As  
455 ratio were subjected to the angular transformation *2Arcsin square root* before analysis.

## 456 **Genotypic characterization of RP and VP**

457 The genetic structure of 228 accessions of RP and 95 advanced lines of VP was analyzed jointly  
458 using a distance-based method. First, a matrix of 3,620 SNPs was extracted from the working  
459 genotypic dataset of 22,370 SNPs common to RP and VP, by discarding loci that had imputed data  
460 and by imposing a minimum distance of 25 kb between two adjacent loci. Then, an unweighted  
461 neighbor-joining tree based on dissymmetry matrix was constructed using DarWin v6.

462 The speed of decay of linkage disequilibrium (LD) in RP and VP was estimated by computing  $r^2$   
463 between pairs of markers on a chromosome basis using Tassel 5.2 software, and then averaging the  
464 results by distance classes using XLSTAT.

## 465 **Association analysis**

466 Separate association analyses were performed with phenotypic and genotypic data from 228  
467 accessions of RP and from 95 advanced lines of VP. A single marker regression-based association  
468 analysis was performed for each phenotypic trait under a mixed linear model (MLM), in which  
469 marker and population structure (Q matrix) effects were considered as fixed and the kinship effect (K  
470 matrix) was considered as random. The MLM was run under the exact method option of Tassel 5.2  
471 software, where the additive genetic and residual variance components are re-estimated for each  
472 SNP. For each SNP tested, Tassel 5.2 computed a p-value, the log likelihood of the null and  
473 alternative models, and the fixed-effect weight of the SNP with its standard error. The threshold to  
474 declare the association of a SNP marker with a trait to be significant was set at a probability level of  
475 1e-05. Genes underlying the significant loci were analyzed using the MSU database  
476 (<http://rice.plantbiology.msu.edu/>) search and gene annotation.

## 477 **Genomic prediction**

### 478 *Construction of the incidence matrix*

479 In order to reduce possible negative effects of redundancy of marker information on the predictive  
480 ability of genomic predictions and to reduce computing time, redundant SNPs were discarded as  
481 follows. First, using the genotypic dataset of the RP (N = 228 entries and P = 22,370 SNPs), for each  
482 SNP, pairwise LD with all other SNPs was calculated. Second, among each group of SNPs in  
483 complete LD ( $r^2 = 1$ ), the first SNP along the chromosome was maintained and all the others were  
484 discarded. This procedure reduced the total number of SNP loci to 16,902. Once the list of these  
485 SNPs was established, the incidence matrix of 16,902 SNP was constructed for the VP accordingly.

### 486 *Cross validation experiment in the RP.*

487 Seven statistical methods were tested: genomic best linear unbiased prediction (GBLUP), BayesA,  
488 BayesB and BayesC, Bayesian lasso and Bayesian ridge regression, and the reproducing kernel  
489 Hilbert spaces regressions (RKHS), using the *BGLR* statistical package [64]. The default parameters  
490 for prior specification were used and the number of iterations for the Markov chain Monte Carlo  
491 (MCMC) algorithm was set to 25,000 with a burn-in period of 5,000.

492 The cross validation experiments used 171 (3/4) of the 228 accessions of the RP as the training set  
493 and the remaining 57 (1/4) accessions as the validation set. Each cross validation experiment was  
494 repeated 100 times using 100 independent partitioning of the RP into training set and validation set.  
495 For each independent partitioning, the correlation between the predicted and the observed phenotype

496 was calculated so as to obtain 100 correlations for each cross validation experiment. The predictive  
497 ability of each cross validation experiment was computed as the mean value of the 100 correlations.

498 To analyze sources of variation in the predictive ability of genomic predictions, the correlation ( $r$ ) of  
499 all prediction experiments was transformed into a Z statistic using the equation:  $Z = 0.5 \{ \ln[1 +$   
500  $r] - \ln[1 - r] \}$  and analyzed as a dependent variable in an analysis of variance. After estimation of  
501 confidence limits and means for Z, these were transformed back to  $r$  variables.

## 502 **Genomic prediction across populations**

503 The predictive ability of genomic prediction across populations was evaluated under three scenarios  
504 of composition of the training set. Under the first scenario (S1), all 228 accessions of the RP were  
505 used as the training set. Under S2, the training set was composed of the 100 accessions of the RP  
506 with the lowest average pairwise Euclidian distances with the 95 lines of the VP. Under S3, 100  
507 accessions of the training set were selected among the 228 accessions of RP, using the CDmean  
508 method of optimization of the training set [59]. In this 3rd scenario, a dedicated training set was  
509 selected for each phenotypic trait to account for trait heritability. Three statistical methods GBLUP,  
510 BayesA and RKHS (that provided the highest predictive ability in the cross-validation experiments)  
511 were tested using the *BGLR* statistical package [64]. For each trait, the predictive ability of the  
512 prediction experiment was calculated as the correlation between the predicted and the observed  
513 phenotypes of the 95 lines.

514

515

## 516 **References**

- 517 1 Meharg AA, et al. Geographical variation in total and inorganic arsenic content of polished  
518 (white) rice. *Environ. Sci. Technol* 43: 1612-1617 (2009).
- 519 2 Zavala YJ, Gerads R, Gorleyok H, Duxbury JM. Arsenic in rice: II. Arsenic speciation in USA  
520 grain and implications for human health. *Environ Sci Technol* 42: 3861-3866 (2008).
- 521 3 Brammer H, Ravenscroft P. Arsenic in groundwater: A threat to sustainable agriculture in South  
522 and South-east Asia. *Environ. Int* 35: 647-654 (2009).
- 523 4 Fan Y, Zhu T, Li M, He J, Huang R. Heavy metal contamination in soil and brown rice and  
524 human health risk assessment near three mining areas in central China. *Journal of Healthcare*  
525 *Engineering*, Doi: 10.1155/2017/4124302 (2017).
- 526 5 Bhattacharya P, Samal AC, Majumdar J, Santra SC. Transfer of arsenic from groundwater and  
527 paddy soil to rice plant (*Oryza sativa* L.): A micro level study in West Bengal, India. *World J.*  
528 *Agric. Sci.* 5: 425-431 (2009).
- 529 6 Abedin MJ, Cotter H, Meharg AA. Arsenic uptake and accumulation in rice (*Oryza sativa* L.)  
530 irrigated with contaminated water. *Plant Soil* 240: 311-319 (2002).
- 531 7 Mitra A, Chatterjee S, Moogouei R, Gupta DK. Arsenic accumulation in rice and probable  
532 mitigation approaches: a review. *Agronomy* (4): 67. doi:10.3390/agronomy7040067 (2017).
- 533 8 Tripathi P, Tripathi RD, Singh RP, Chakrabarty D. Silicon mediates arsenic tolerance in rice  
534 (*Oryza sativa* L.) through lowering of arsenic uptake and improved antioxidant defence system.  
535 *Ecological Engineering* 52:96-103. doi: 10.1016/j.ecoleng.2012.12.057 (2012).
- 536 9 Verbruggen N, Hermans C, Schat H. Mechanisms to cope with arsenic or cadmium excess in  
537 plants. *Current Opinion in Plant Biology* 12:364-372. Doi: 10.1016/j.pbi.2009.05.001 (2009).
- 538 10 Zhao FJ, Ma JF, Meharg AA, McGrath SP. Arsenic uptake and metabolism in plants. *New*  
539 *Phytol* 181: 777-794 (2009).
- 540 11 Castrillo G, et al. WRKY6 transcription factor restricts arsenate uptake and transposon activation  
541 in *Arabidopsis*. *Plant Cell* 25: 2944-2957 (2013).
- 542 12 Bleeker PM, Hakvoort HW, Blik M, Souer E, Schat H. Enhanced arsenate reduction by a  
543 CDC25-like tyrosine phosphatase explains increased phytochelatin accumulation in arsenate-  
544 tolerant *Holcus lanatus*. *Plant J* 45: 917-929 (2006).
- 545 13 Ellis DR, Gumaelius L, Indriolo E, Pickering IJ, Banks JA, Salt DE. A novel arsenate reductase  
546 from the arsenic hyperaccumulating fern *Pteris vittata*. *Plant Physiol* 141: 1544-1554 (2006).
- 547 14 Xu J, et al. OsHAC4 is critical for arsenate tolerance and regulates arsenic accumulation in rice.  
548 *New Phytologist* 215: 1090-1101. doi: 10.1111/nph.14572 (2017).
- 549 15 Zhao FJ, McGrath SP, Meharg AA. Arsenic as a food chain contaminant: mechanisms of plant  
550 uptake and metabolism and mitigation strategies. *Annu Rev Plant Biol* 61: 535-559 (2010).
- 551 16 Ye WL, et al. Arsenic speciation in phloem and xylem exudates of castor bean. *Plant Physiol*  
552 154:1505-1513. Doi: 10.1104/pp.110.163261 (2010).
- 553 17 Song WY, et al. Arsenic tolerance in *Arabidopsis* is mediated by two ABCC-type phytochelatin  
554 transporters. *PNAS USA* 107: 21187-21192 (2010).

- 555 18 Xu XY, McGrath SP, Meharg AA, Zhao FJ. Growing rice aerobically markedly decreases  
556 arsenic accumulation. *Environ Sci Technol* 42:5574-5579 (2008).
- 557 19 Ma JF, et al. Transporters of arsenite in rice and their role in arsenic accumulation in rice grain.  
558 *PNAS USA* 105: 9931-9935 (2008).
- 559 20 Zhao XQ, Mitani N, Yamaji N, Shen RF, Ma JF. Involvement of silicon influx transporter  
560 OsNIP2;1 in selenite uptake in rice. *Plant Physiol* 153: 1871-1877 (2010).
- 561 21 Rai A, et al. Comparative Transcriptional Profiling of Contrasting Rice Genotypes Shows  
562 Expression Differences during Arsenic Stress. *The Plant Genome* 8 (2) 1-14. doi:  
563 10.3835/plantgenome2014.09.0054 (2015).
- 564 22 Chen Y, Han Y-H, Cao Y, Zhu Y-G, Rathinasabapathi B, Ma LQ. Arsenic transport in rice and  
565 biological solutions to reduce arsenic risk from rice. *Front. Plant Sci* 8:268. doi:  
566 10.3389/fpls.2017.00268 (2017).
- 567 23 Dasgupta S, Hossain SA, Meharg AA, Price AH. An arsenate tolerance gene on chromosome 6  
568 of rice. *New Phytologist* 163: 45-49 (2014).
- 569 24 Norton GJ, et al. Environmental and genetic control of arsenic accumulation and speciation in  
570 rice grain: comparing a range of common cultivars grown in contaminated sites across  
571 Bangladesh, China and India. *Environ Sci Technol* 43: 8381-8386 (2009).
- 572 25 Norton GJ, Duan G, Lei M, Zhu YG, Meharg AA, Price AH. Identification of quantitative trait  
573 loci for rice grain element composition on an arsenic impacted soil: Influence of flowering time  
574 on genetic loci. *Ann Appl Biol*. 161: 46-56 (2012).
- 575 26 Kuramata M, et al. Genetic diversity of arsenic accumulation in rice and QTL analysis of  
576 methylated arsenic in rice grains. *Rice*. <http://www.thericejournal.com/content/6/1/3> (2013).
- 577 27 Norton GJ, et al. Variation in grain arsenic assessed in a diverse panel of rice (*Oryza sativa*)  
578 grown in multiple sites. *New Phyt*. 193: 650-664 (2012).
- 579 28 Norton GJ, Deacon CM, Xiong L, Huang S, Meharg AA, Price AH. Genetic mapping of the rice  
580 ionome in leaves and grain: Identification of QTLs for 17 elements including arsenic, cadmium,  
581 iron and selenium. *Plant Soil* 329: 139- 153 (2010).
- 582 29 Zhang M, et al. Mapping and validation of quantitative trait loci associated with concentration of  
583 16 elements in unmilled rice grain. *Theor Appl Genet*. 127(1): 137-165. doi: 10.1007/s0012-013-  
584 2207-5 (2013).
- 585 30 Norton GT, et al. Genome wide association mapping of grain arsenic, copper, molybdenum and  
586 zinc in rice (*Oryza sativa* L.) grown at four international field sites. *Plos One* 9(2) 89685 (2014).
- 587 31 Norton GJ, Lou-Hing DE, Meharg AA, Price AH. Rice and arsenate interactions in hydroponics:  
588 whole genome transcriptional analysis. *J Exp Bot*. 59:2267-2276 (2008).
- 589 32 Chakrabarty D, et al. Comparative transcriptome analysis of arsenate and arsenite stresses in rice  
590 seedlings. *Chemosphere* 74:688-702 (2009).
- 591 33 Dubey S, et al. Heavy metals induce oxidative stress and genome-wide modulation in  
592 transcriptome of rice root. *Funct. Integr. Genomics* 14:401-417. doi:10.1007/s10142-014-0361-8  
593 (2014).
- 594 34 Begum MC, Islam MS, Islam M, Amin R, Parvez MS, Kabir AH. Biochemical and molecular  
595 responses underlying differential arsenic tolerance in rice (*Oryza sativa* L.). *Plant Physiol*  
596 *Biochem*. 104: 266-277. doi: 10.1016/j.plaphy.2016.03.034 (2016).



- 597 35 Misra P, et al. Modulation of transcriptome and metabolome of tobacco by Arabidopsis  
598 transcription factor, AtMYB12, leads to insect resistance. *Plant Physiol.* 152:2258-2268.  
599 doi:10.1104/pp.109.150979 (2010).
- 600 36 Shi S, et al. OsHAC1;1 and OsHAC1;2 Function as Arsenate Reductases and Regulate Arsenic  
601 Accumulation. *Plant Physiology.* 2016; 172: 1708-1719. doi/10.1104/pp.16.01332"
- 602 37 Adomako EE, Solaiman ARM, Williams PN, Deacon C, Rahman GK, Meharg AA. Enhanced  
603 transfer of arsenic to grain for Bangladesh grown rice compared to US and EU. *Environment*  
604 *International* 35: 476-479 (2009).
- 605 38 Williams PN, et al. Greatly enhanced arsenic shoot assimilation in rice leads to elevated grain  
606 levels compared to wheat and barley. *Environ Sci Technol.* 41(19):6854-9 (2007).
- 607 39 Huang TL, Nguyen QTT, Fu SF, Lin CY, Chen YC, Huang HG. Transcriptomic changes and  
608 signaling pathways induced by arsenic stress in rice roots. *Plant Mol. Biol.* 80:587-608.  
609 doi:10.1007/s11103-012-9969-z (2012).
- 610 40 Visscher PM, et al. 10 years of gwas discovery: biology, function, and translation. *The American*  
611 *Journal of Human Genetics.* 101: 5-22. Doi: 10.1016/j.ajhg.2017.06.005 (2017).
- 612 41 Yu JM, et al. A unified mixed-model method for association mapping that accounts for multiple  
613 levels of relatedness, *Nat. Genet.* 38: 203-208 (2006).
- 614 42 Fernando RL, et al. Controlling the proportion of false positives in multiple dependent tests.  
615 *Genetics* 166:611-619 (2004).
- 616 43 Eccles DA, Lea RA, Chambers GK. Bootstrap distillation: non-parametric internal validation of  
617 gwas results by subgroup resampling. *bioRxiv* doi: 10.1101/104497 (2017).
- 618 44 Lafarge T, Bueno CS, Frouin J, Jacquin L, Courtois B, Ahmadi N. Genome-wide association  
619 analysis for heat tolerance at flowering detected a large set of genes involved in adaptation to  
620 thermal and other stresses. *PLoS ONE* 12(2): e0171254 doi:10.1371/journal.pone.0171254  
621 (2017).
- 622 45 Frouin J, et al. Tolerance to mild salinity stress in japonica rice: A genome-wide association  
623 mapping study highlights calcium signaling and metabolism genes. *PLoS ONE* 13(1): e0190964.  
624 doi: 10.1371/journal.pone.0190964 (2018).
- 625 46 Loannidis JAP, Thomas G, Daly MJ. Validating, augmenting and refining genome-wide  
626 association signals. *Nature reviews Genetics* 10:318-329. doi: 10.1038/nrg2544 (2009).
- 627 47 Henshall J.M. Validation of Genome-Wide Association Studies (GWAS) Results. In: Cedric  
628 Gondro et al. (eds.), *Genome-wide association studies and genomic prediction. Methods in*  
629 *molecular biology* 1019: 411-421 (2013).
- 630 48 Nordborg M, Weigel D. Next-generation genetics in plants. *Nature* 456: 720-723. doi:  
631 10.1038/nature07629 (2008).
- 632 49 Ben Hassen M, et al. Rice diversity panel provides accurate genomic predictions for complex  
633 traits in the progenies of biparental crosses involving members of the panel. *Theor. Appl. Genet.*  
634 doi: 10.1007/s00122-017-3011-4 (2017).
- 635 50 Jarquin D, et al. Genotyping by sequencing for genomic prediction in a soybean breeding  
636 population. *BMC Genomics* 15:740. doi:10.1186/1471-2164-15-740 (2014).



- 637 51 Sallam A, Endelman J, Jannink JL, Smith K. Assessing genomic selection prediction accuracy in  
638 a dynamic barley breeding population. *Plant Genome* 8:1.  
639 doi:10.3835/plantgenome2014.05.0020 (2015).
- 640 52 Grenier C, et al. Accuracy of genomic selection in a rice synthetic population developed for  
641 recurrent selection breeding. *PLoS ONE* 10(8): e0136594. doi:10.1371/journal.pone.0136594  
642 (2015).
- 643 53 Michel S, et al. Genomic selection across multiple breeding cycles in applied bread wheat  
644 breeding. *Theor Appl Genet.* 129:1179-1189. doi: 10.1007/s00122-016-2694-2 (2016).
- 645 54 Howard P, Carriquiry AL, Beavis WD. Parametric and nonparametric statistical methods for  
646 genomic selection of traits with additive and epistatic genetic architectures. *G3* 4:1027-1046.  
647 doi: 10.1534/g3.114.010298 (2014).
- 648 55 Jannink JL, Lorenz AJ, Iwata H. Genomic selection in plant breeding: from theory to practice.  
649 *Briefings in Functional Genomics and Proteomics* 9: 166-177. doi: 10.1093/bfpg/elq001 (2010).
- 650 56 Hofheinz N, Borchardt D, Weissleder K, Frisch M. Genome based prediction of test cross  
651 performance in two subsequent breeding cycles. *Theor Appl Genet.* 125:1639-1645.  
652 doi:10.1007/s00122-012-1940-5 (2012).
- 653 57 Gezan SA, Osorio LF, Verma S, Whitaker VM. An experimental validation of genomic selection  
654 in octoploid strawberry. *Horticulture Research.* 2017; 4: 16070; doi:10.1038/hortres.2016.70
- 655 58 Zhang A, et al. Effect of trait heritability, training population size and marker density on  
656 genomic prediction accuracy estimation in 22 bi-parental tropical maize populations. *Front Plant*  
657 *Sci.* 8:1916. doi:10.3389/fpls.2017.01916 (2017).
- 658 59 Rincent R, et al. Maximizing the reliability of genomic selection by optimizing the calibration  
659 set of reference individuals: Comparison of methods in two diverse groups of maize inbreds (*Zea*  
660 *mays* L.). *Genetics* Doi: 10.1534/genetics.112.141473 (2012).
- 661 60 Ioannidis JP, Thomas G, Daly MJ. Validating, augmenting and refining genome-wide  
662 association signals. *Nat. Rev. Genet.* 10:318-29 (2009).
- 663 61 Habier D, Fernando RL Dekkers JCM. Genomic selection using low-density marker panels.  
664 *Genetics* 182: 343-353. doi: 10.1534/genetics.108.100289 (2009).
- 665 62 Courtois B, et al. Genetic diversity and population structure in a European collection of rice.  
666 *Crop Science* 52:1663-1675 (2012).
- 667 63 Kawahara Y, et al. Improvement of the *Oryza sativa* Nipponbare reference genome using next  
668 generation sequence and optical map data. *Rice.* 6: 4. <https://doi.org/10.1186/1939-8433-6-4>  
669 PMID: 24280374 (2013).
- 670 64 Perez P, de Los Campos G. Genome-wide regression and prediction with the BGLR statistical  
671 package. *Genetics* 198(2):483±95. doi: 10.1534/genetics.114.164442 (2014).

672

673 **Acknowledgements:** This work was supported by the CIRAD - UMR AGAP HPC Data Center of  
674 the South Green Bioinformatics platform (<http://www.southgreen.fr/>). We thank the members of CFR  
675 who helped conducting the field experiments and the members of the AGAP joint research unit who  
676 helped sample leaves and panicles in the field. We thank Brigitte Courtois for her critical review of  
677 the manuscript.

678 **Funding:** This work was funded by FranceAgrimer (<http://www.franceagrimer.fr/>), Grants SIVAL  
679 n°2013-1296, SIVAL n° 2014-1382, and SIVAL n° 2015-0761.

680

681 **Authors' contributions:**

682 NA: conceived the study, analyzed the data and wrote the manuscript.

683 JF: produced the genotypic and phenotypic data and wrote the manuscript.

684 GAS: provided expertise and laboratory facilities for the measurement of arsenic concentration.

685 AL and AB: ran the field experiments and selected the advanced lines composing the validation  
686 population.

687

688 **Additional information**

689 ***Data availability statement:***

690 The Phenotypic data analyzed for this study are included in the supplementary table 1

691 The datasets generated and analysed during the current study are available in the ML  
692 panel\_GBS\_data repository, <http://tropgenedb.cirad.fr/tropgene/JSP/interface.jsp?module=RICE>

693

694 ***Competing interests:***

695 The authors declare that they have no competing interests

696

697 **Figure 1:** Distribution of adjusted phenotypic values for flag leaf arsenic content (FL-As), Cargo  
698 grain arsenic content (CG-As), and the CG-As/FL-As ratio, in the reference (RP) and validation (VP)  
699 populations.

700 **Figure 2:** Patterns of decay in linkage disequilibrium in the reference population (green) and in the  
701 validation population (blue). The curve represents the average  $r^2$  among the 12 chromosomes; the  
702 bars represent the associated standard deviation.

703 **Figure 3:** Unweighted neighbor-joining tree based on simple matching distances constructed from  
704 the genotype of 228 accessions of the reference population (RP) and 95 advanced lines of the  
705 validation population (VP), using 3,620 SNP markers. Green: VP; Red and blue: RP accessions  
706 belonging to tropical *japonica* and temperate *japonica*, respectively.

707 **Figure 4:** Results of association analyses in the reference population (RP) and the validation  
708 population (VP) in the present study, and comparison with data from the literature. For the present  
709 study, data points represent SNPs significantly associated with arsenic concentration in the flag leaf  
710 (FL-As) in the cargo grain (CG-As), and the CG-As/FL-As ratio in RP and VP. Data from the  
711 literature include significant SNPs mapped by GWAS [30], QTLs for grain arsenic concentration [25,  
712 29] and candidate genes [21, 39].

713 **Figure 5:** Predictive ability of genomic prediction of the arsenic concentration in the flag leaf (FL-  
714 As) in the cargo grain (CG-As), and for the CG-As/FL-As ratio of the validation population obtained  
715 with three statistical methods, BayesB, GBLUP and RKHS, under three scenarios of composition of  
716 the training set.

717

718 **Table 1:** Variance components of three phenotypic traits in the reference population (RP) evaluated  
719 in 2014 and in 50 selected accessions of RP evaluated in 2015

| Trial                        | Factors             | FL-As  |     | CG-As |     | Ratio |     | FL     |      |
|------------------------------|---------------------|--------|-----|-------|-----|-------|-----|--------|------|
| 300 RP<br>accessions<br>2014 | Accession (A)       | 10.39  | *** | 0.012 | *** | 0.022 | *** | 167.79 | ***  |
|                              | Replicate (R)       | 6.68   | NS  | 0.121 | *** | 0.055 | NS  | 134.87 | NS   |
|                              | (A) x (R)           | 8.37   | NS  | 0.005 | *** | 0.009 | NS  | 38.83  | NS   |
|                              | Residual            | 4.13   |     | 0.004 |     | 0.011 |     | 27.05  |      |
|                              | h <sup>2</sup> (SE) | 0.831  |     | 0.864 |     | 0.803 |     | 0.920  |      |
| 50 RP<br>accessions<br>2015  | Accession           | 425.30 | *** | 0.042 | *** | 0.050 | *** | 865.04 | **** |
|                              | Replicate           | 286.18 | *** | 0.006 | *** | 0.071 | *** | 18.57  | NS   |
|                              | Residual            | 17.45  |     | 0.002 |     | 0.005 |     | 7.54   |      |
|                              | h <sup>2</sup> (SE) | 0.995  |     | 0.994 |     | 0.911 |     | 0.998  |      |

720 FL-As: flag leaf arsenic content; CG-As: cargo grain arsenic content; Ratio: CG-As/FL-As; FL: time to flowering; h<sup>2</sup>:  
721 broad sense heritability; \*\*\*: significant at p≤0.001; NS: not significant.

722

723 **Table 2:** Predictive ability (r) of seven methods of genomic prediction for three rice arsenic content  
724 traits in the reference population, based on cross validation experiments.

| Prediction<br>method | Phenotypic traits |              |              |              |              |              | Average<br>r |
|----------------------|-------------------|--------------|--------------|--------------|--------------|--------------|--------------|
|                      | FL-As             |              | CG-As        |              | Ratio        |              |              |
|                      | r                 | sd           | r            | sd           | r            | sd           |              |
| GBLUP                | 0.449             | 0.155        | 0.535        | 0.166        | 0.356        | 0.159        | <b>0.446</b> |
| BayesA               | 0.452             | 0.154        | 0.537        | 0.171        | 0.366        | 0.158        | <b>0.452</b> |
| BayesB               | 0.425             | 0.450        | 0.533        | 0.164        | 0.348        | 0.165        | <b>0.436</b> |
| BayesC               | 0.442             | 0.160        | 0.519        | 0.163        | 0.344        | 0.162        | <b>0.435</b> |
| BL                   | 0.455             | 0.153        | 0.526        | 0.166        | 0.353        | 0.160        | <b>0.445</b> |
| BRR                  | 0.455             | 0.153        | 0.536        | 0.167        | 0.356        | 0.162        | <b>0.449</b> |
| RKHS                 | 0.408             | 0.941        | 0.549        | 0.086        | 0.468        | 0.125        | <b>0.475</b> |
| <b>Average</b>       | <b>0.441</b>      | <b>0.309</b> | <b>0.533</b> | <b>0.154</b> | <b>0.370</b> | <b>0.156</b> | <b>0.448</b> |

725 FL-As: flag leaf arsenic content; CG-As: cargo grain arsenic content; Ratio: CG-As/FL-As. r: average predictive ability;  
726 sd: standard deviation.

727

728

## 729 **Supporting information**

730 **S1 Table.** Main characteristics of the 228 accessions of the reference population (RP) and 95  
731 advanced lines of the validation population.

732 **S2 Table.** Soil and water arsenic contents in the experimental site over the three years of field  
733 experiments.

734 **S3 Table.** Variability of marker density and frequency of minor alleles (MAF) along the 12  
735 chromosomes in the reference and the validation populations.

736 **S4 Table.** Average arsenic contents of the two subgroups of *O. sativa japonica* present in the  
737 reference population (RP) and in the validation population (VP).

738 **S5 Table.** Results of association analysis of the concentration of arsenic in the flag leaf (FL-As) in  
739 the cargo grain (CG-As), and for the CG-As/FL-As ratio, in the reference population (RP) and in the  
740 validation population (RV).

741 **S6 Table.** Colocalization of SNP loci significantly associated with arsenic content traits in the  
742 present study with similar loci reported in the literature.

743 **S7 Table 7.** Predictive ability of genomic estimate of breeding value of the 95 advanced lines of the  
744 validation population for arsenic contents, by three genomic prediction models trained with data from  
745 228 accessions of the reference population.

746 **S8 table 8.** Translation of predictive ability of genomic prediction into genetic gain under different  
747 selection intensities.

748 **S1 Figure.** Distribution of the 22,370 working set SNP markers along the 12 chromosomes in the  
749 reference and validation populations.

750 **S2 Figure.** Distribution of adjusted phenotypic values for arsenic content of the flag leaf (FL-As) and  
751 arsenic content of the cargo grain (CG-As), in the reference and validation populations, according to  
752 membership of the accessions of temperate japonica and tropical japonica subgroups.

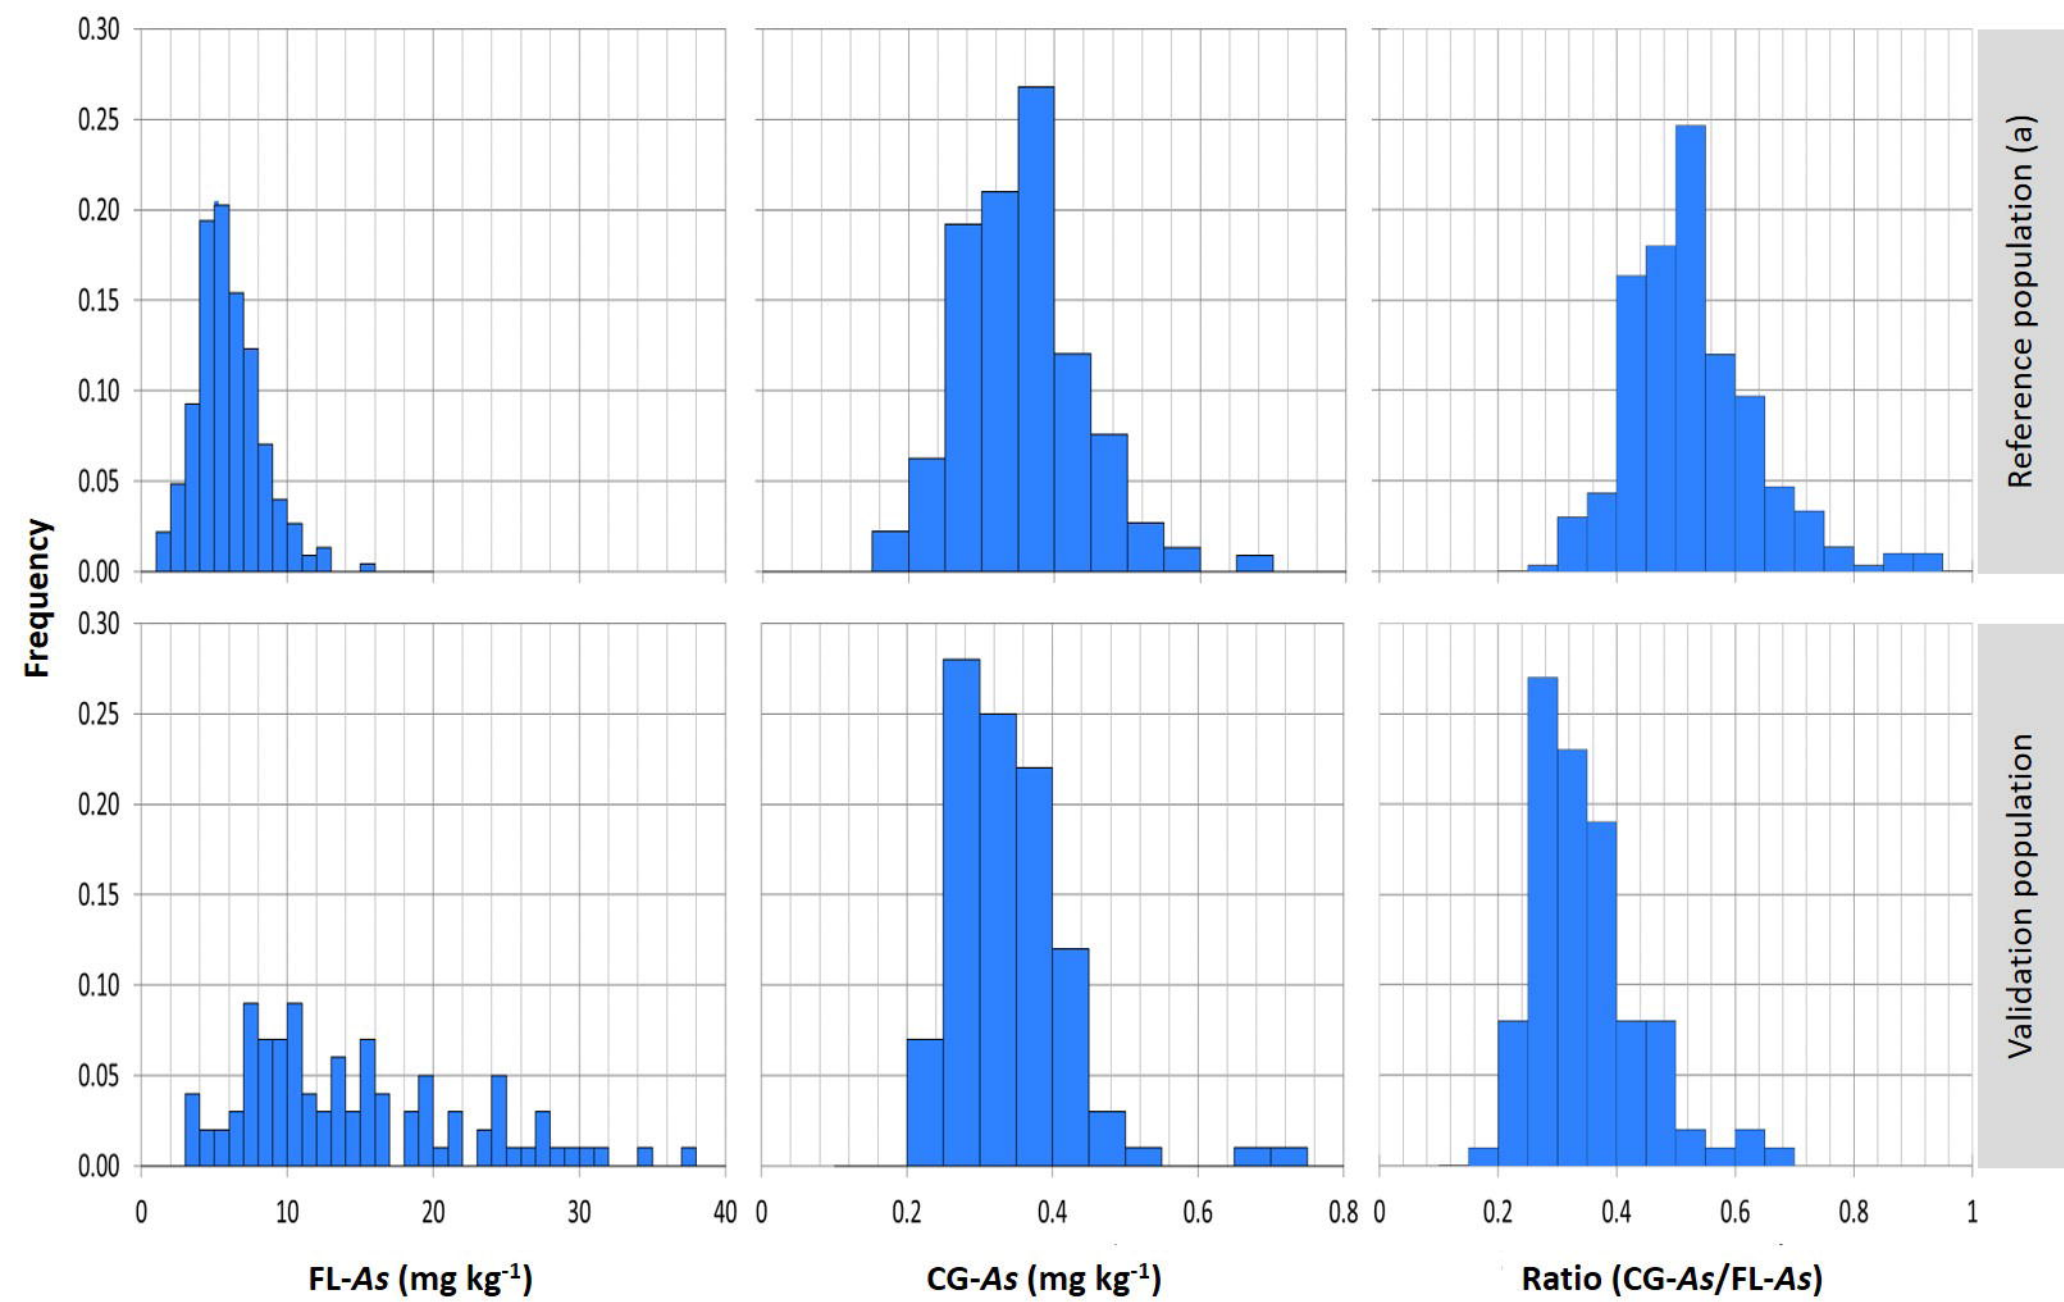

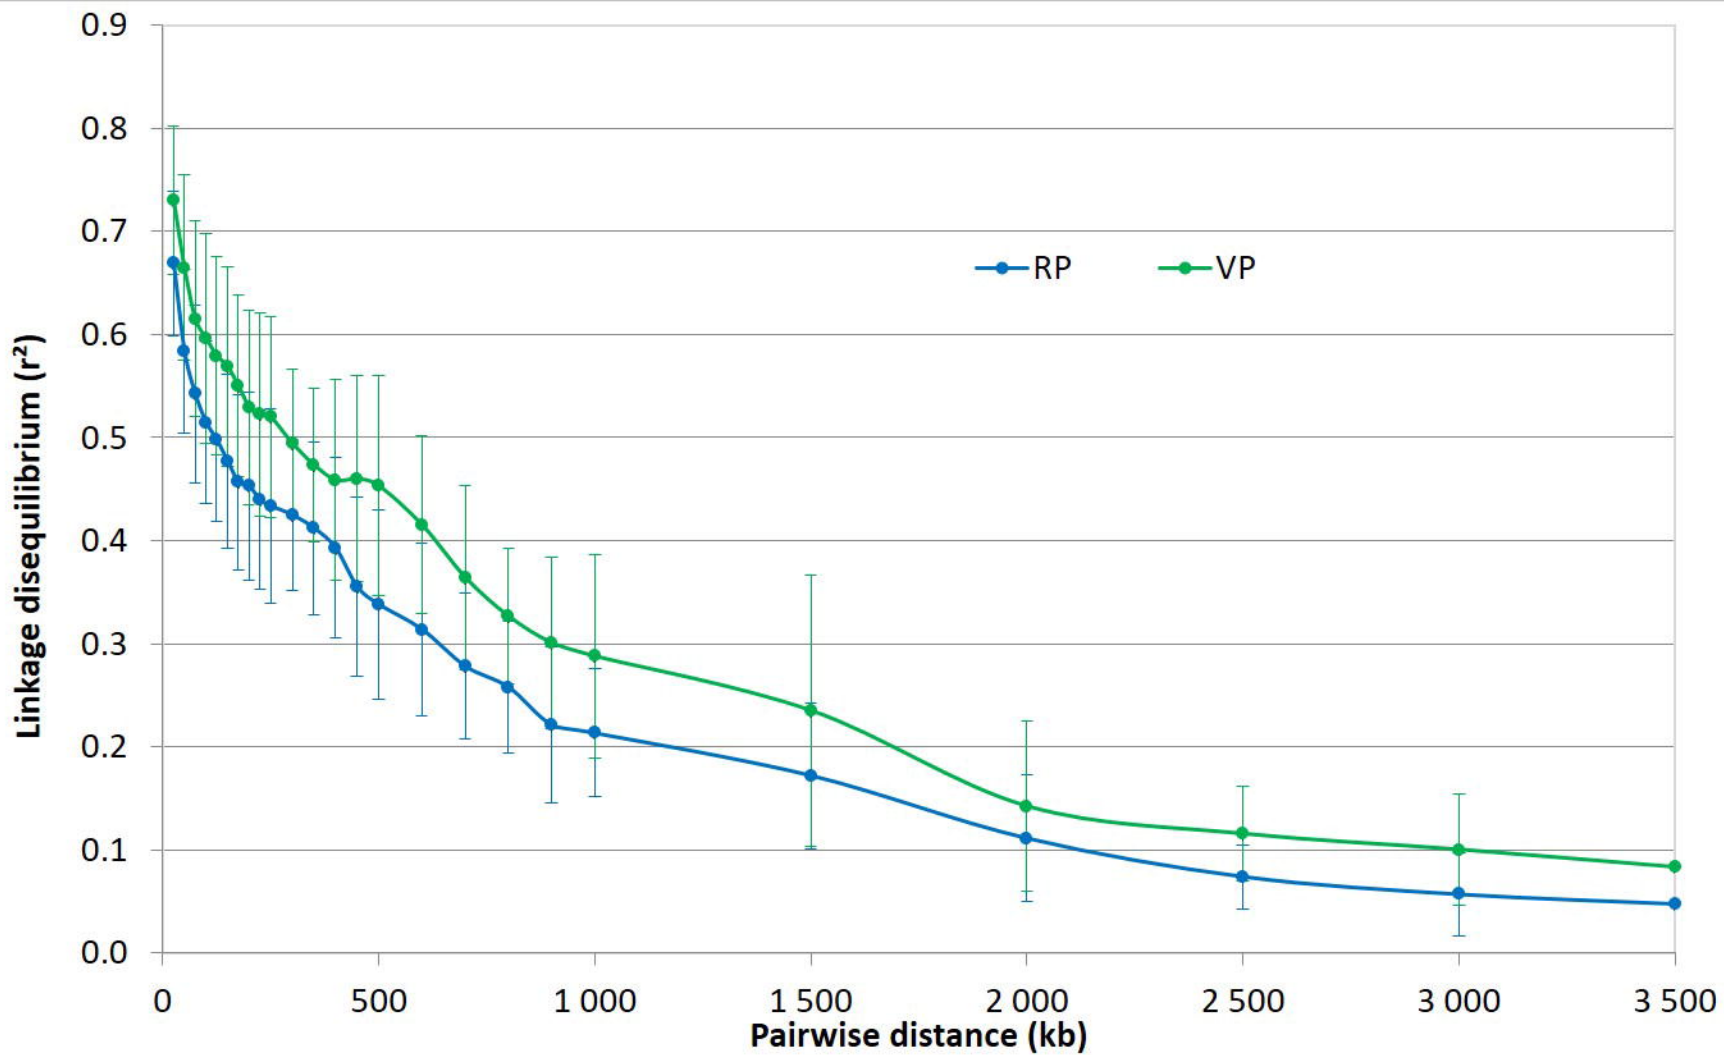



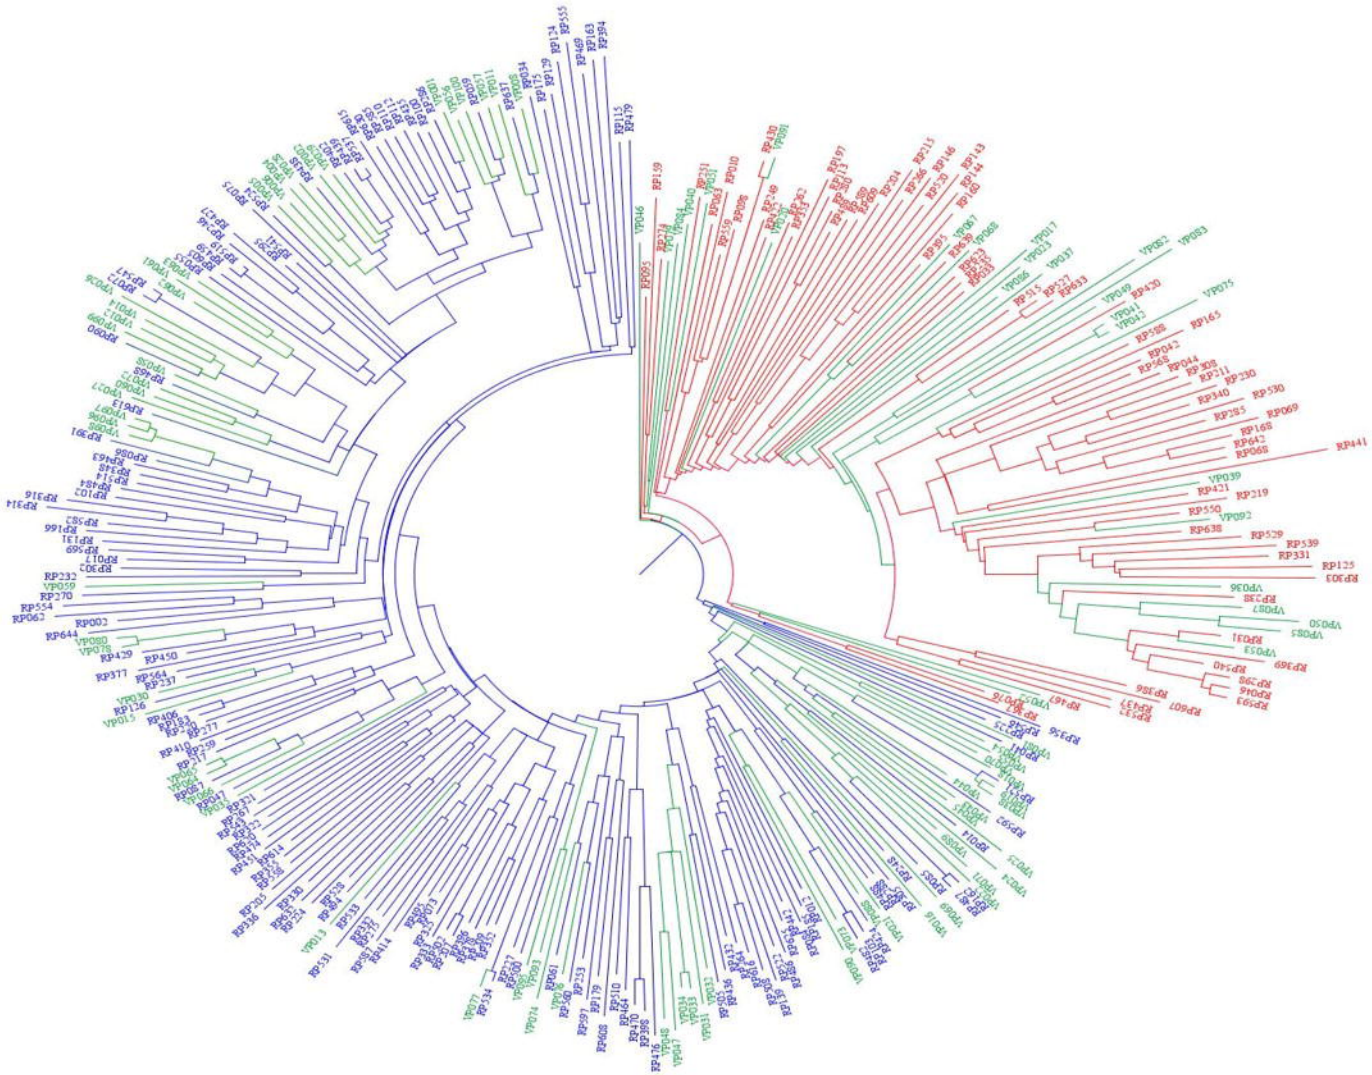

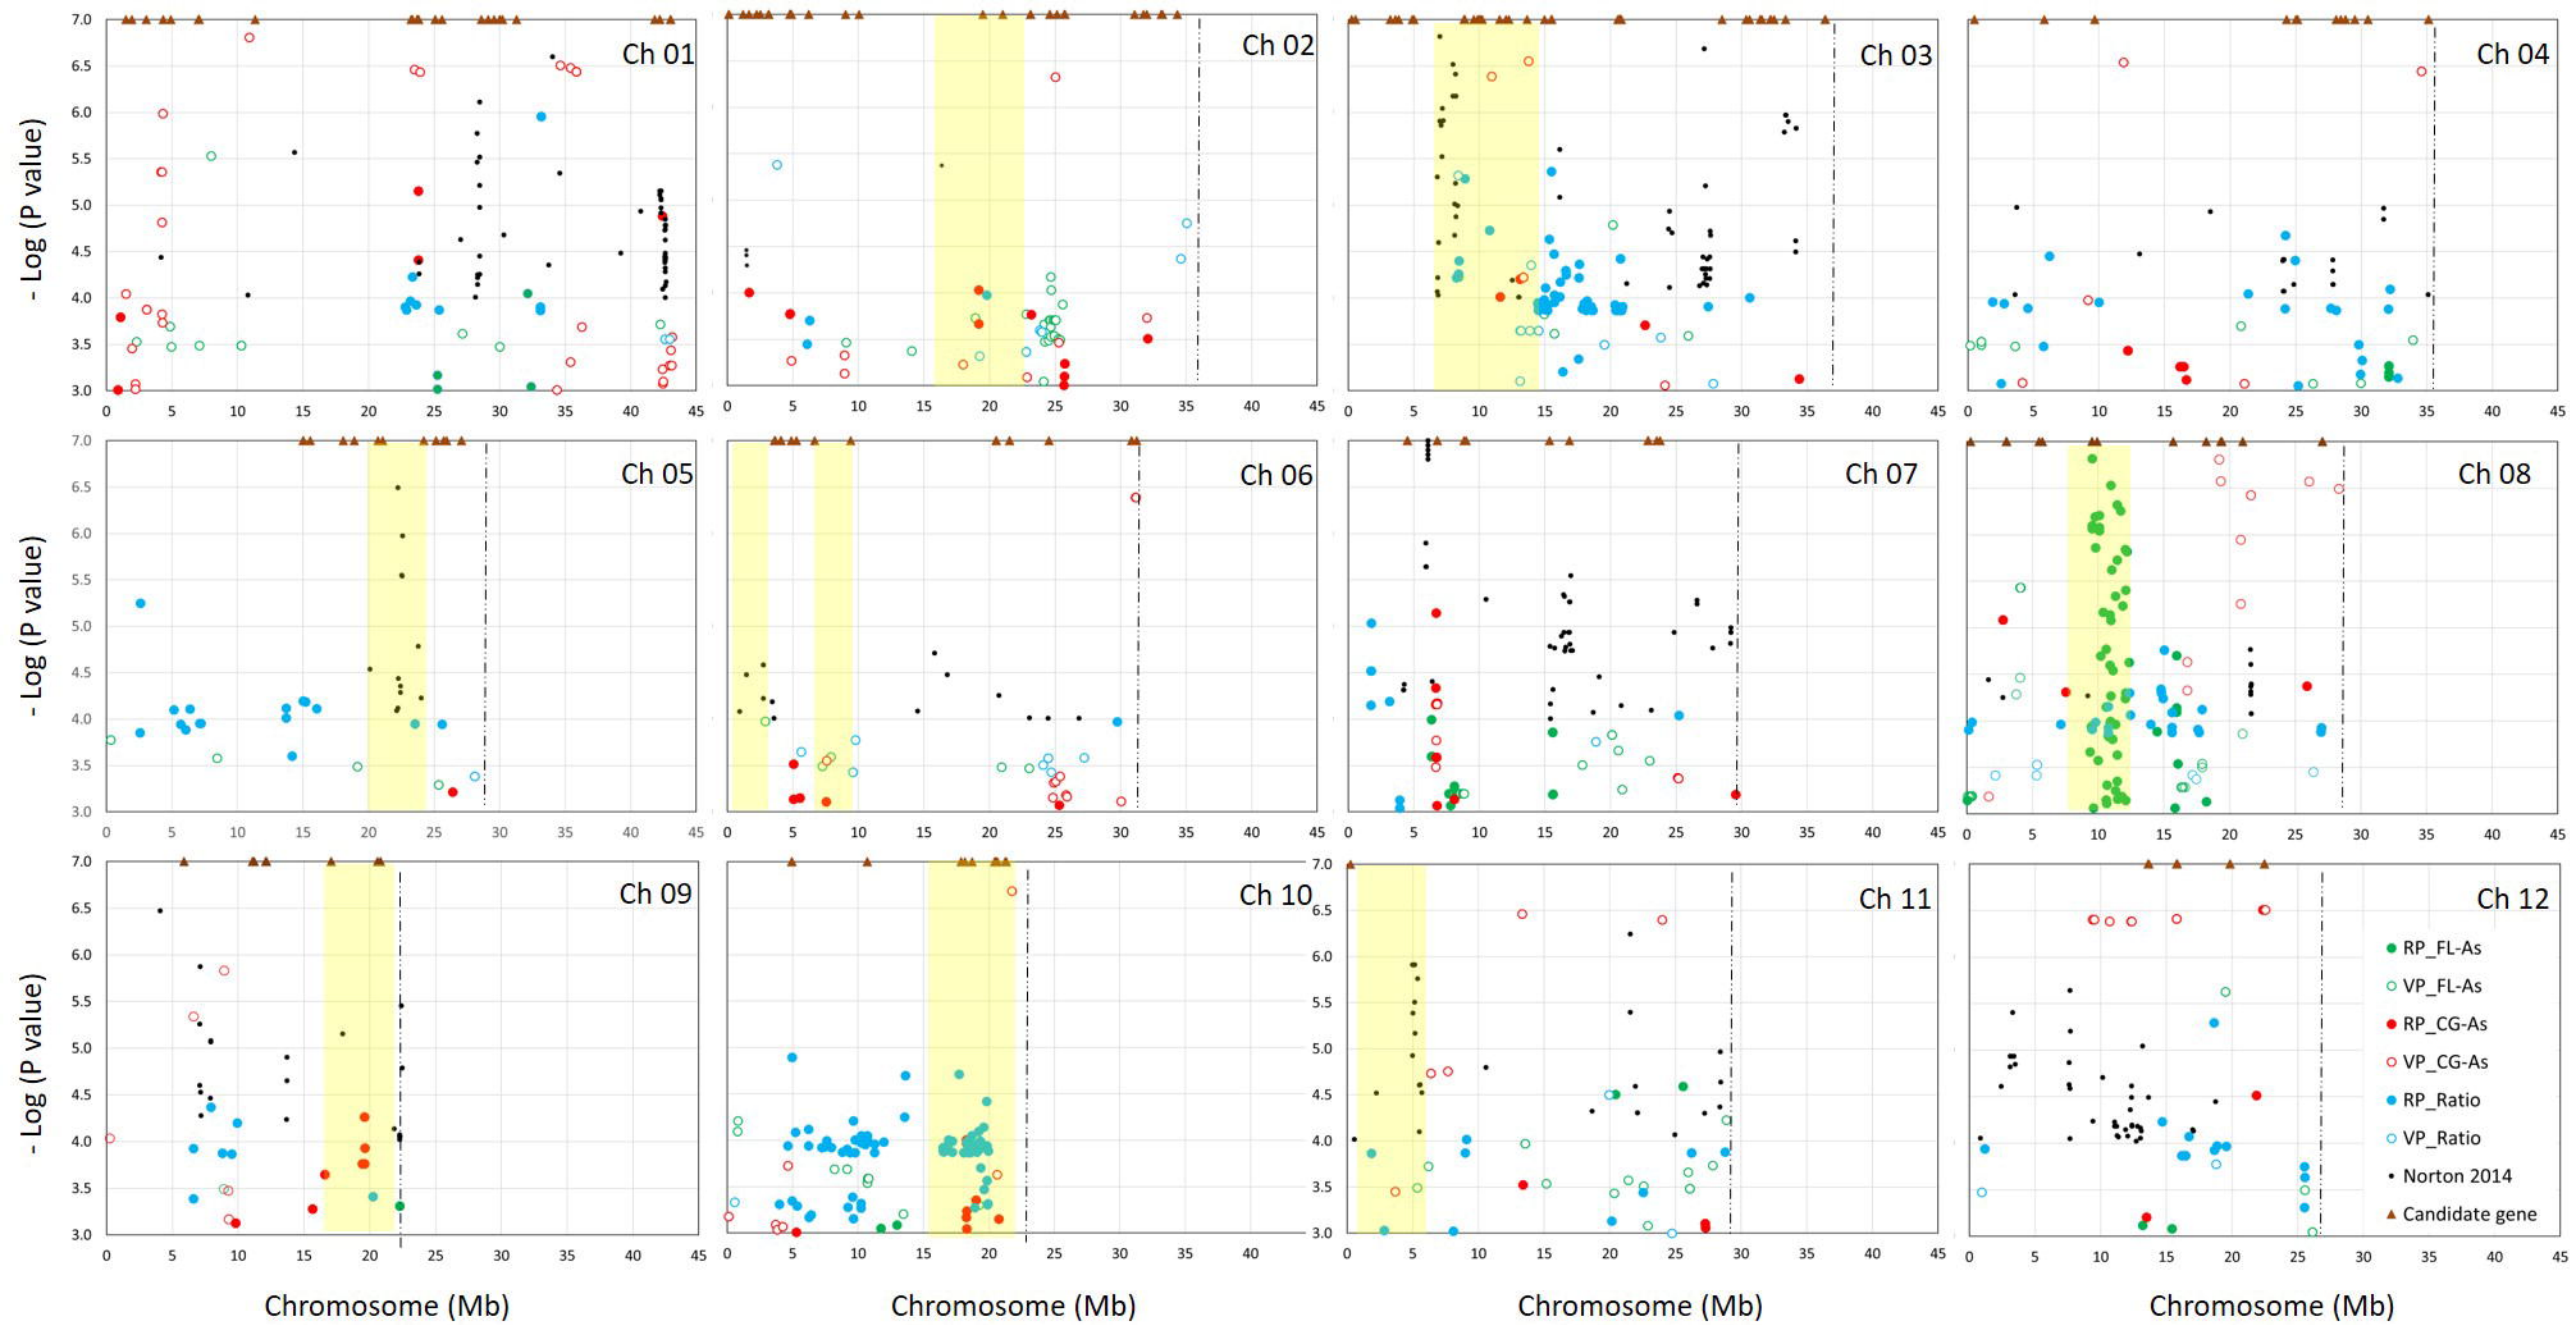

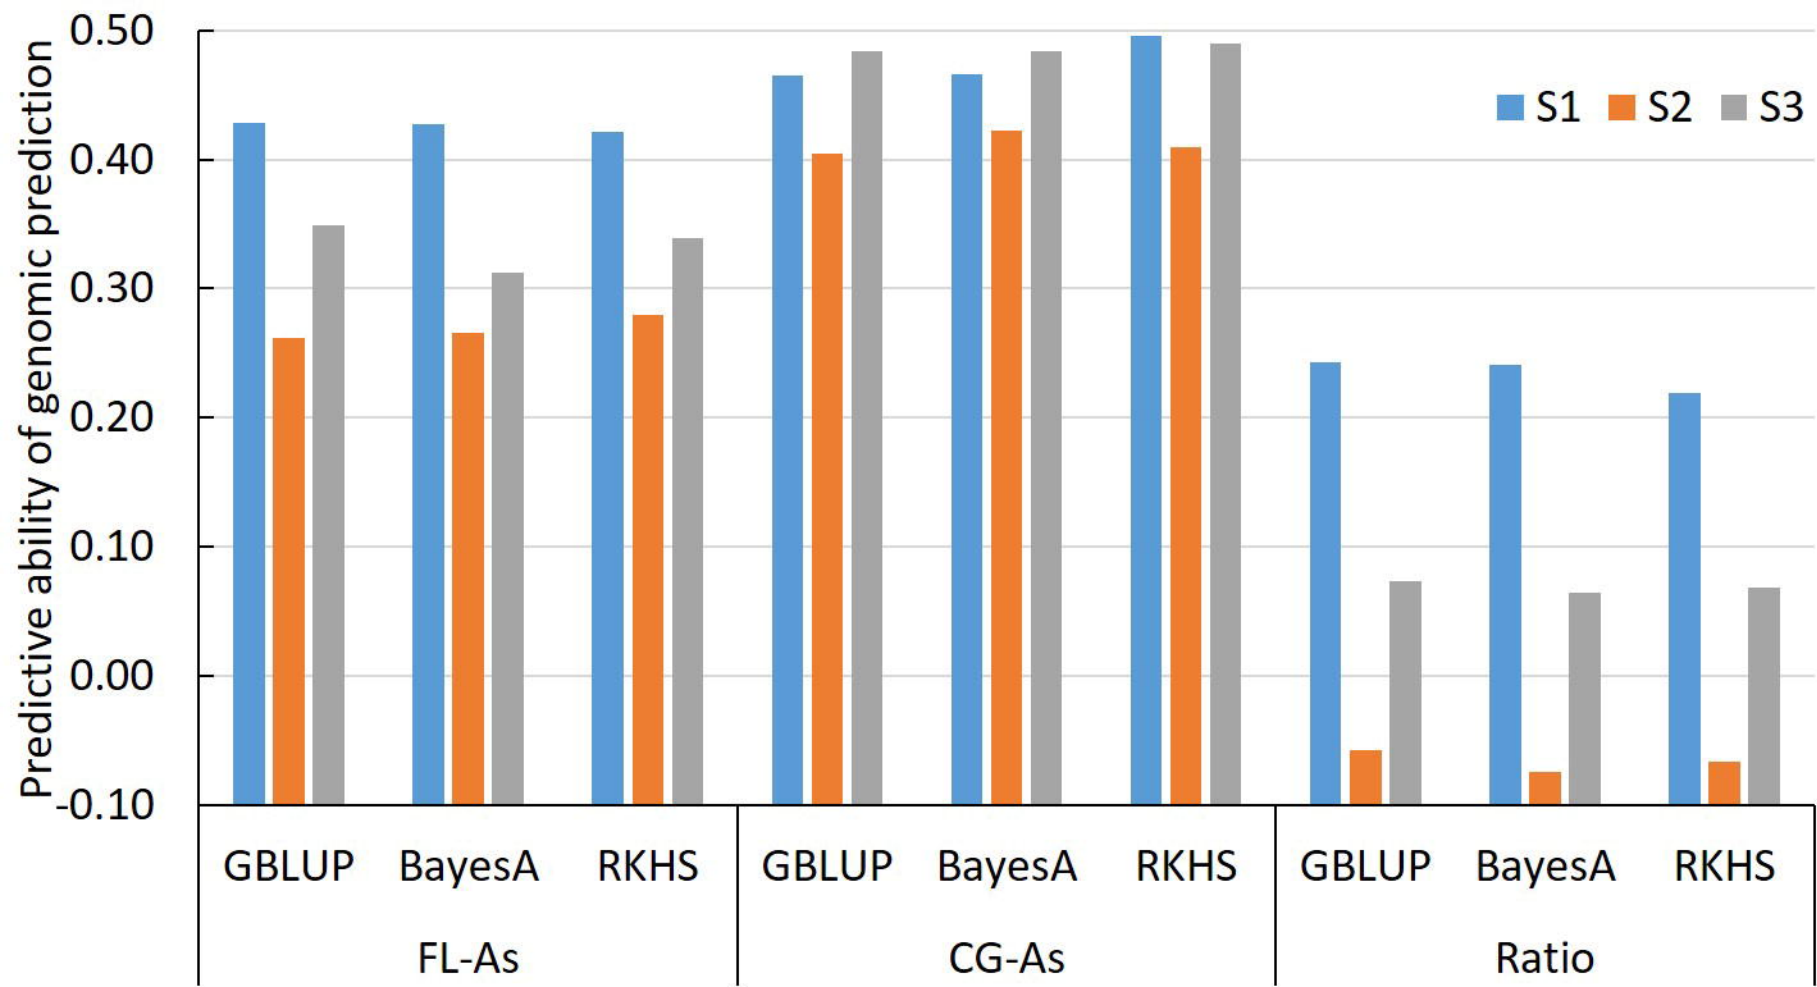

Source: https://www.biorxiv.org/content/10.1101/452276v1.full.pdf
